# Supplementary material
Source: PubMed Central journal article supplement (PMC5187671)
Supplement: pnas.1612849113.sapp.pdf [file pnas.1612849113.sapp.pdf]

# Supporting Information: Ideal charge density wave order in the high-field state of superconducting YBCO

H. Jang<sup>a,1</sup>, W.-S. Lee<sup>b,1</sup>, H. Nojiri<sup>c</sup>, S. Matsuzawa<sup>c</sup>, H. Yasumura<sup>c</sup>, L. Nie<sup>d</sup>, A. V. Maharaj<sup>d</sup>, S. Gerber<sup>e</sup>, Y.-J. Liu<sup>a</sup>, A. Mehta<sup>a</sup>, D. A. Bonn<sup>f,g</sup>, R. Liang<sup>f,g</sup>, W. N. Hardy<sup>f,g</sup>, C. A. Burns<sup>a,h</sup>, Z. Islam<sup>i</sup>, S. Song<sup>j</sup>, J. Hastings<sup>j</sup>, T. P. Devereaux<sup>b</sup>, Z.-X. Shen<sup>b,d</sup>, S. A. Kivelson<sup>d</sup>, C.-C. Kao<sup>k</sup>, D. Zhu<sup>i,2</sup>, and J.-S. Lee<sup>a,1,2</sup>

<sup>a</sup>Stanford Synchrotron Radiation Lightsource, SLAC National Accelerator Laboratory, Menlo Park, CA 94025; <sup>b</sup>Stanford Institute for Materials and Energy Science, SLAC National Accelerator Laboratory and Stanford University, Menlo Park, CA 94025; <sup>c</sup>Institute for Materials Research, Tohoku University, Katahira 2-1-1, Sendai, 980-8577, Japan; <sup>d</sup>Geballe Laboratory for Advanced Materials, Departments of Physics and Applied Physics, Stanford University, Stanford, CA 94305; <sup>e</sup>SwissFEL, Paul Scherrer Institut, 5232 Villigen PSI, Switzerland; <sup>f</sup>Department of Physics & Astronomy, University of British Columbia, Vancouver, British Columbia, Canada V6T 1Z1; <sup>g</sup>Canadian Institute for Advanced Research, Toronto, Ontario, Canada M5G 1Z8; <sup>h</sup>Department of Physics, Western Michigan University, Kalamazoo, MI, 49008; <sup>i</sup>The Advanced Photon Source, Argonne National Laboratory, Argonne, IL 60439; <sup>j</sup>Linac Coherent Light Source, SLAC National Accelerator Laboratory, Menlo Park, CA 94025; <sup>k</sup>SLAC National Accelerator Laboratory, Menlo Park, CA 94025

This supporting information was compiled on September 27, 2016

Our proposed interpretation of the x-ray results involves two basic assumptions: 1) In the absence of disorder, the intrinsic electronic correlations favor the formation of a unidirectional, incommensurate CDW, and 2) there are large scale inhomogeneities in the sample, which we treat schematically as regions of “More” and “Less” disorder. In this Supporting Information, we discuss how such assumptions can lead naturally to a sharp crossover in the directionality and correlation length of the CDW as the magnetic field is increased. Figure 5 in the main text illustrates the basic physics - in the  $\sigma - \Lambda$  plane where  $\sigma$  characterizes the strength of disorder and  $\Lambda$  is the strength of the CDW (an increasing function of increasing magnetic field), there is a sharp crossover from short ranged bidirectional CDW correlations to longer ranged, strongly unidirectional CDW correlations. In a tetragonal cuprate, this would be associated with a thermodynamic phase transition to a nematic state, a form of “vestigial” order. We assume that at low fields both More and Less disordered regions are in the isotropic phase, while at low temperatures above a critical field strength the Less disordered regions enter the nematic phase, thus exhibiting strong unidirectional character.

## A classical effective field theory

While many of the major points that underlie our proposal follow on rather general grounds from the statistical mechanics of disordered systems, the most straightforward way to illustrate them is by turning to the solution of the effective model of an incommensurate CDW introduced in Ref. [S1]. We consider a classical effective field theory with two complex fields,  $\psi_x(\vec{r})$  and  $\psi_y(\vec{r})$ , representing the slowly varying amplitude of a CDW at wave vectors  $\vec{Q}_x = q\hat{x}$  and  $\vec{Q}_y = q\hat{y}$ , respectively. A biquadratic coupling of the form  $2\Delta|\psi_x|^2|\psi_y|^2$  appears in the effective action, where we take  $\Delta > 0$  which favors unidirectional (stripe) over bidirectional (checkerboard) order. This model can be solved in the self-consistent Gaussian approximation using the replica trick to treat the disorder. The results are controlled in a formal  $N \rightarrow \infty$  limit in which  $\psi_x$  is an  $O(N)$  vector; it has been shown to agree qualitatively with results of Monte-Carlo simulations on the same model for the physical ( $N = 2$ ) case in Ref. [S2].

As we are only interested in qualitative results, we will simplify the problem at the expense of neglecting several material specific features of YBCO: We consider a model with

one plane per unit cell and assume an interlayer coupling,  $V_z > 0$ , that favors in-phase interplane ordering. Moreover, we have not included the in-plane anisotropy of the CDW stiffness constants, *i.e.* in the notation of Ref. [S1] we have taken  $\kappa_{\parallel} = \kappa_{\perp} = 1$ . (The final equality amounts to a particular choice of units of in-plane length,  $b = 1$ .)

For this simplified model, (for in-plane momenta  $k_x^2 + k_y^2 \ll q^2$ ) the CDW structure factor can be expressed as

$$\begin{aligned} S(\vec{k} + \vec{Q}_x) &= TG(\vec{k}, \mu + \mathcal{N}) + \sigma^2 |G(\vec{k}, \mu + \mathcal{N})|^2 \\ S(\vec{k} + \vec{Q}_y) &= TG(\vec{k}, \mu - \mathcal{N}) + \sigma^2 |G(\vec{k}, \mu - \mathcal{N})|^2 \end{aligned} \quad [\text{S1}]$$

where

$$G^{-1}(\vec{k}, \mu) = \mu + k_x^2 + k_y^2 + V_z[1 - \cos(k_z c)]. \quad [\text{S2}]$$

$G$  can be recognized as the simple Ornstein Zernike form of the order parameter correlations in a generic system in the disordered phase proximate to a critical point.  $k_z$  is the out-of-plane dispersion and  $c$  is the  $c$ -axis lattice parameter. The only subtlety is that the effective chemical potential ( $\mu$ ) and the “nematic order parameter” ( $\mathcal{N}$ ), are determined from the self-consistency equations,

$$\Lambda(T, H) = \int \frac{d\vec{k}}{(2\pi)^3} [S(\vec{k} + \vec{Q}_x) + S(\vec{k} + \vec{Q}_y)] \quad [\text{S3}]$$

where  $\Lambda$  is the mean squared amplitude of the CDW order parameter (assumed to be an otherwise known function of  $T$  and  $H$ ), and

$$\mathcal{N} = \mathcal{N}_0 + 2\Delta \int \frac{d\vec{k}}{(2\pi)^3} [S(\vec{k} + \vec{Q}_y) - S(\vec{k} + \vec{Q}_x)] \quad [\text{S4}]$$

where  $\mathcal{N}_0$  is an intrinsic nematicity (due to the orthorhombicity of the crystal). Again, for simplicity, we will henceforth report results in the limit  $\mathcal{N}_0 \rightarrow 0^+$ . In this case,  $\mathcal{N} = 0$  is always a possible solution of the self-consistency equations. However, if the CDW ordering tendency is sufficiently strong (*i.e.* for  $\Lambda(T, H) > \Lambda_c$  where the critical value  $\Lambda_c$  is itself a function of

<sup>1</sup>These authors (H.J., W.-S.L., and J.-S.L.) contributed equally to this work.

<sup>2</sup>To whom correspondence should be addressed. E-mail: dzhu@slac.stanford.edu (D.Z.) or jslee@slac.stanford.edu (J.-S.L.)

125  $T$  and  $\sigma$ ), a second solution with  $\mathcal{N} > 0$  is preferred; this is the  
 126 nematic phase which spontaneously breaks the point-group  
 127 symmetry. Consistent with general theorems, so long as  $\sigma > 0$ ,  
 128 the CDW order inferred from these equations always has a  
 129 finite correlation length, *i.e.* there is never long-range CDW  
 130 order in the presence of even weak quenched randomness.

131 This set of equations was analyzed under various circum-  
 132 stances in Ref. [S1]. Generally, as the system is tuned from  
 133 the isotropic to the nematic phase in any fashion (for instance,  
 134 by increasing  $\Lambda$ ) several changes in the nature of the correla-  
 135 tions onset very rapidly at the transition point: The in-plane  
 136 correlation length,  $\xi_{ab}$ , grows substantially as does the inter-  
 137 plane correlation length,  $\xi_c$ , so long as  $V_z$  is not too small.  
 138 The degree of directionality,  $S(\vec{Q}_y)/S(\vec{Q}_x)$ , which is 1 in the  
 139 isotropic phase, becomes rapidly much larger than 1 in the  
 140 nematic phase. Simultaneously, the peak intensity,  $S(\vec{Q}_y)$ ,  
 141 shows the most dramatic increase of all.

142 As an illustrative example, we consider the simplest case of  
 143  $T = 0$  and vanishingly small interplane [S3] coupling,  $V_z \rightarrow 0$ .  
 144 In this limit, the various integrals can be evaluated analytically.  
 145 The self-consistency equations (which one is to solve for  $\mu$  and  
 146  $\mathcal{N}$ ) become

$$147 \Lambda(0, H) = \left(\frac{\sigma^2}{2\pi}\right) \left[\frac{\mu}{\mu^2 - \mathcal{N}^2}\right] \quad [S5]$$

$$148 \mathcal{N} = 2\Delta \left(\frac{\sigma^2}{2\pi}\right) \left[\frac{\mathcal{N}}{\mu^2 - \mathcal{N}^2}\right]$$

149 from which it follows that the critical value of  $\Lambda$  for the  
 150 occurrence of the nematic phase is

$$151 \Lambda_c = \frac{\sigma}{2\sqrt{\pi}\Delta}. \quad [S6]$$

152 For  $\Lambda < \Lambda_c$ ,  $\mu = \sigma^2/2\pi\Lambda$  and the in-plane correlation lengths  
 153 and intensities of the peaks at  $\vec{Q}_x$  and  $\vec{Q}_y$  are

$$154 \xi_{ab}(\vec{Q}_x) = \xi_{ab}(\vec{Q}_y) = \frac{1}{\sqrt{\mu}} \quad \text{and}$$

$$155 S(\vec{Q}_x) = S(\vec{Q}_y) = 2\pi\Lambda|\xi_{ab}(\vec{Q}_y)|^4.$$

156 For  $\Lambda > \Lambda_c$ ,  $\mu = 2\Delta\Lambda$ ,  $\mathcal{N} = 2\Delta\sqrt{[\Lambda^2 - \Lambda_c^2]}$ , and

$$157 \xi_{ab}(\vec{Q}_x) = \frac{1}{\sqrt{\mu + \mathcal{N}}}, \quad \xi_{ab}(\vec{Q}_y) = \frac{1}{\sqrt{\mu - \mathcal{N}}}, \quad [S7]$$

158 and

$$159 \frac{S(\vec{Q}_y)}{S(\vec{Q}_x)} = \left[\frac{\xi_{ab}(\vec{Q}_y)}{\xi_{ab}(\vec{Q}_x)}\right]^4. \quad [S8]$$

160 To address the growth of 3D correlations in the nematic  
 161 phase, it is obviously necessary to include explicitly the effects  
 162 of non-zero  $V_z$ . While the self consistency equations are still  
 163 analytically tractable, the solutions are sufficiently complicated  
 164 that we only evaluate them numerically. The inter-plane  
 165 correlation length can be computed as

$$166 \xi_c = (c/2) \left[\text{arcsinh}(1/\xi_{ab}\sqrt{2V_z})\right]^{-1}. \quad [S9]$$

167 Clearly, there is strong tendency to increased 3D order when  
 168 the in-plane correlations become sufficiently long.

169 In Fig. S1, we show the evolution of these quantities  
 170 computed numerically from the full self-consistency equations  
 171 with  $V_z = 0.1$  as a function of  $\Lambda$  for two different values

172 of  $\sigma$ , one representative of the More and one of the Less  
 173 disordered regimes, under the assumption  $\sigma_{\text{More}}/\sigma_{\text{Less}} = 1.5$ .  
 174 To make contact with experiment, one should imagine that  
 175 the field dependence of  $\Lambda$  determined by competition with  
 176 superconductivity,  $\Lambda = \Lambda_0[1 - |\phi|^2]$ , where the amplitude of  
 177 the superconducting order  $\phi$  is (presumably) a decreasing  
 178 function of increasing  $H$ . There is clearly a sharp increase in  
 179 the in-plane correlation lengths and peak intensities at the  
 180 nematic phase transition.

181 **Subtleties and ambiguities:** One implication of “random-  
 182 field-type” disorder is slow dynamics which inevitably result in  
 183 the system falling out of equilibrium upon cooling before the  
 184 point of the transition is reached. A rather subtle experimental  
 185 protocol is necessary to establish the existence of a broken  
 186 symmetry phase experimentally [S4]. However, YBCO is  
 187 weakly orthorhombic, which in the current context means  
 188 that there is effectively always a small symmetry breaking  
 189 field; this rounds the transition to the nematic state, but  
 190 at the same time reduces the tendency to the formation of a  
 191 metastable nematic domain structure. (From a complementary  
 192 perspective, it is possible to look for a growing thermodynamic  
 193 correlation length by detecting [S5] the telltale hysteresis and  
 194 noise characteristic of the random-field-Ising model in this  
 195 limit [S6].)

196 One might still worry that the time-scales involved in a  
 197 pulsed field experiment could exacerbate non-equilibrium ef-  
 198 fects. However, since the slow dynamics are associated with  
 199 reorientation of growing domains [S7, S8], the characteristic  
 200 relaxation rates depend exponentially on domain size. There-  
 201 fore, once the experimental time scales are large compared to  
 202 microscopic time scales (as they are in our experiment), an  
 203 enormous increase in the time scale only permits one to probe  
 204 the equilibrium physics of slightly larger domains.

205 Finally, it is tempting to try to estimate the volume frac-  
 206 tions of the More and Less disordered regions from the relative  
 207 strengths of their contributions to the x-ray scattering inten-  
 208 sity,  $I(\vec{k})$ . However, making connection between the calculated  
 209 and measured quantities carries with additional uncertainties.  
 210  $I(\vec{k})$  is generally dominated by scattering of the atomic cores,  
 211 and so is a measure of the atomic displacements. A periodic  
 212 pattern of atomic displacements proportional to the CDW  
 213 order parameter,  $\psi$ , is generic. However, while positions and  
 214 widths of the observable peaks in  $I(\vec{k})$  reflect the pattern  
 215 of translation symmetry breaking and the CDW correlation  
 216 length, the variation of intensity from one Brillouin zone to the  
 217 other encodes the precise pattern of induced lattice distortion.  
 218 Crudely,

$$219 I(\vec{k}) = I(\vec{K} + \vec{Q}) \approx I_0(\vec{K})S(\vec{Q}) \quad [S10]$$

220 where  $\vec{K}$  is a reciprocal lattice vector, and  $I_0(K)$  is a compli-  
 221 cated structure factor.

222 If the scattering intensities were measured in sufficiently  
 223 many different Brillouin zones, one could work backwards to  
 224 the actual lattice displacements induced by the CDW. This  
 225 has been undertaken for the low field diffraction data in Ref.  
 226 [S9]. Because of the constraints of the high field experiment,  
 227 our data is limited to little over one Brillouin zone, so such  
 228 a refinement is not possible. Even in the one Brillouin zone  
 229 we study, we have not directly measured the peak width in all  
 230 directions — our estimates of the correlation volume involve  
 231 the implicit assumption that the correlation length is not much  
 232 different in the  $a$  and  $b$  directions. For all these reasons, there

|     |                                                                                                                                                                                                                                                                                                                                                                                                |                                                                                                                                                                                               |     |
|-----|------------------------------------------------------------------------------------------------------------------------------------------------------------------------------------------------------------------------------------------------------------------------------------------------------------------------------------------------------------------------------------------------|-----------------------------------------------------------------------------------------------------------------------------------------------------------------------------------------------|-----|
| 249 | is considerable unavoidable uncertainty in any estimate we                                                                                                                                                                                                                                                                                                                                     | we find the integrated intensity in the 2D peaks is roughly 5                                                                                                                                 | 311 |
| 250 | might make of the relative volume fractions of the two regions.                                                                                                                                                                                                                                                                                                                                | times that in the 3D peak suggesting that something between                                                                                                                                   | 312 |
| 251 | These worries aside, in the ortho-VIII sample at 25 T [S10],                                                                                                                                                                                                                                                                                                                                   | 10% and 20% of the sample is Less disordered.                                                                                                                                                 | 313 |
| 252 |                                                                                                                                                                                                                                                                                                                                                                                                |                                                                                                                                                                                               | 314 |
| 253 |                                                                                                                                                                                                                                                                                                                                                                                                |                                                                                                                                                                                               | 315 |
| 254 |                                                                                                                                                                                                                                                                                                                                                                                                |                                                                                                                                                                                               | 316 |
| 255 | S1 Nie L, Tarjus G, Kivelson SA (2014) Quenched disorder and vestigial nematicity in the pseudo-gap regime of the cuprates. <i>PNAS</i> 111(22):7980–7985.                                                                                                                                                                                                                                     | derdoped $\text{YBa}_2\text{Cu}_2\text{O}_{7-\delta}$ Nanowires: Evidence for Fluctuating Domain Structures. <i>Phys. Rev. Lett.</i> 93(8):087002.                                            | 317 |
| 256 | S2 Nie L, Sierens LEH, Melko RG, Sachdev S, Kivelson SA (2015) Fluctuating orders and quenched randomness in the cuprates. <i>Phys. Rev. B</i> 92(17):174505.                                                                                                                                                                                                                                  | S6 Carlson EW, Dahmen KA, Fradkin E, Kivelson SA (2006) Hysteresis and Noise from Electronic Nematicity in High-Temperature Superconductors. <i>Phys. Rev. Lett.</i> 96(9):097003.            | 318 |
| 257 | S3 (Note) Strictly speaking, the nematic phase we find for $V_z = 0$ is an artifact of the large $N$ approximation; random field disorder precludes even discrete symmetry breaking in 2D. However, as shown in ref. [1], for small but non-zero $V_z$ , the nematic phase is robustly recovered, even when $V_z$ is small enough that it has little effect on the quantities considered here. | S7 Bruinsma R, Aeppli G (1984) Interface Motion and Nonequilibrium Properties of the Random-Field Ising Model. <i>Phys. Rev. Lett.</i> 52(17):1547–1550.                                      | 319 |
| 258 |                                                                                                                                                                                                                                                                                                                                                                                                | S8 Huse DA, Fisher DS (1987) Dynamics of droplet fluctuations in pure and random Ising systems. <i>Phys. Rev. B</i> 35(13):6841–6846.                                                         | 320 |
| 259 |                                                                                                                                                                                                                                                                                                                                                                                                | S9 Forgan EM et al. (2015) The microscopic structure of charge density waves in underdoped $\text{YBa}_2\text{Cu}_3\text{O}_{6.54}$ revealed by X-ray diffraction. <i>Nat Commun</i> 6:10064. | 321 |
| 260 | S4 Birgeneau RJ, Shapira Y, Shirane G, Cowley RA, Yoshizawa H (1986) Random fields and phase transitions. <i>Physica B+C</i> 137(1):83–95.                                                                                                                                                                                                                                                     | S10 Gerber S et al. (2015) Three-dimensional charge density wave order in $\text{YBa}_2\text{Cu}_3\text{O}_{6.67}$ at high magnetic fields. <i>Science</i> 350(6263):949–952.                 | 322 |
| 261 | S5 Bonetti JA, Caplan DS, Van Harlingen DJ, Weissman MB (2004) Electronic Transport in Un-                                                                                                                                                                                                                                                                                                     |                                                                                                                                                                                               | 323 |
| 262 |                                                                                                                                                                                                                                                                                                                                                                                                |                                                                                                                                                                                               | 324 |
| 263 |                                                                                                                                                                                                                                                                                                                                                                                                |                                                                                                                                                                                               | 325 |
| 264 |                                                                                                                                                                                                                                                                                                                                                                                                |                                                                                                                                                                                               | 326 |
| 265 |                                                                                                                                                                                                                                                                                                                                                                                                |                                                                                                                                                                                               | 327 |
| 266 |                                                                                                                                                                                                                                                                                                                                                                                                |                                                                                                                                                                                               | 328 |
| 267 |                                                                                                                                                                                                                                                                                                                                                                                                |                                                                                                                                                                                               | 329 |
| 268 |                                                                                                                                                                                                                                                                                                                                                                                                |                                                                                                                                                                                               | 330 |
| 269 |                                                                                                                                                                                                                                                                                                                                                                                                |                                                                                                                                                                                               | 331 |
| 270 |                                                                                                                                                                                                                                                                                                                                                                                                |                                                                                                                                                                                               | 332 |
| 271 |                                                                                                                                                                                                                                                                                                                                                                                                |                                                                                                                                                                                               | 333 |
| 272 |                                                                                                                                                                                                                                                                                                                                                                                                |                                                                                                                                                                                               | 334 |
| 273 |                                                                                                                                                                                                                                                                                                                                                                                                |                                                                                                                                                                                               | 335 |
| 274 |                                                                                                                                                                                                                                                                                                                                                                                                |                                                                                                                                                                                               | 336 |
| 275 |                                                                                                                                                                                                                                                                                                                                                                                                |                                                                                                                                                                                               | 337 |
| 276 |                                                                                                                                                                                                                                                                                                                                                                                                |                                                                                                                                                                                               | 338 |
| 277 |                                                                                                                                                                                                                                                                                                                                                                                                |                                                                                                                                                                                               | 339 |
| 278 |                                                                                                                                                                                                                                                                                                                                                                                                |                                                                                                                                                                                               | 340 |
| 279 |                                                                                                                                                                                                                                                                                                                                                                                                |                                                                                                                                                                                               | 341 |
| 280 |                                                                                                                                                                                                                                                                                                                                                                                                |                                                                                                                                                                                               | 342 |
| 281 |                                                                                                                                                                                                                                                                                                                                                                                                |                                                                                                                                                                                               | 343 |
| 282 |                                                                                                                                                                                                                                                                                                                                                                                                |                                                                                                                                                                                               | 344 |
| 283 |                                                                                                                                                                                                                                                                                                                                                                                                |                                                                                                                                                                                               | 345 |
| 284 |                                                                                                                                                                                                                                                                                                                                                                                                |                                                                                                                                                                                               | 346 |
| 285 |                                                                                                                                                                                                                                                                                                                                                                                                |                                                                                                                                                                                               | 347 |
| 286 |                                                                                                                                                                                                                                                                                                                                                                                                |                                                                                                                                                                                               | 348 |
| 287 |                                                                                                                                                                                                                                                                                                                                                                                                |                                                                                                                                                                                               | 349 |
| 288 |                                                                                                                                                                                                                                                                                                                                                                                                |                                                                                                                                                                                               | 350 |
| 289 |                                                                                                                                                                                                                                                                                                                                                                                                |                                                                                                                                                                                               | 351 |
| 290 |                                                                                                                                                                                                                                                                                                                                                                                                |                                                                                                                                                                                               | 352 |
| 291 |                                                                                                                                                                                                                                                                                                                                                                                                |                                                                                                                                                                                               | 353 |
| 292 |                                                                                                                                                                                                                                                                                                                                                                                                |                                                                                                                                                                                               | 354 |
| 293 |                                                                                                                                                                                                                                                                                                                                                                                                |                                                                                                                                                                                               | 355 |
| 294 |                                                                                                                                                                                                                                                                                                                                                                                                |                                                                                                                                                                                               | 356 |
| 295 |                                                                                                                                                                                                                                                                                                                                                                                                |                                                                                                                                                                                               | 357 |
| 296 |                                                                                                                                                                                                                                                                                                                                                                                                |                                                                                                                                                                                               | 358 |
| 297 |                                                                                                                                                                                                                                                                                                                                                                                                |                                                                                                                                                                                               | 359 |
| 298 |                                                                                                                                                                                                                                                                                                                                                                                                |                                                                                                                                                                                               | 360 |
| 299 |                                                                                                                                                                                                                                                                                                                                                                                                |                                                                                                                                                                                               | 361 |
| 300 |                                                                                                                                                                                                                                                                                                                                                                                                |                                                                                                                                                                                               | 362 |
| 301 |                                                                                                                                                                                                                                                                                                                                                                                                |                                                                                                                                                                                               | 363 |
| 302 |                                                                                                                                                                                                                                                                                                                                                                                                |                                                                                                                                                                                               | 364 |
| 303 |                                                                                                                                                                                                                                                                                                                                                                                                |                                                                                                                                                                                               | 365 |
| 304 |                                                                                                                                                                                                                                                                                                                                                                                                |                                                                                                                                                                                               | 366 |
| 305 |                                                                                                                                                                                                                                                                                                                                                                                                |                                                                                                                                                                                               | 367 |
| 306 |                                                                                                                                                                                                                                                                                                                                                                                                |                                                                                                                                                                                               | 368 |
| 307 |                                                                                                                                                                                                                                                                                                                                                                                                |                                                                                                                                                                                               | 369 |
| 308 |                                                                                                                                                                                                                                                                                                                                                                                                |                                                                                                                                                                                               | 370 |
| 309 |                                                                                                                                                                                                                                                                                                                                                                                                |                                                                                                                                                                                               | 371 |
| 310 |                                                                                                                                                                                                                                                                                                                                                                                                |                                                                                                                                                                                               | 372 |

DRAFT

373  
374  
375  
376  
377  
378  
379  
380  
381  
382  
383  
384  
385  
386  
387  
388  
389  
390  
391  
392  
393  
394  
395  
396  
397  
398  
399  
400  
401  
402  
403  
404  
405  
406  
407  
408  
409  
410  
411  
412  
413  
414  
415  
416  
417  
418  
419  
420  
421  
422  
423  
424  
425  
426  
427  
428  
429  
430  
431  
432  
433  
434

435  
436  
437  
438  
439  
440  
441  
442  
443  
444  
445  
446  
447  
448  
449  
450  
451  
452  
453  
454  
455  
456  
457  
458  
459  
460  
461  
462  
463  
464  
465  
466  
467  
468  
469  
470  
471  
472  
473  
474  
475  
476  
477  
478  
479  
480  
481  
482  
483  
484  
485  
486  
487  
488  
489  
490  
491  
492  
493  
494  
495  
496

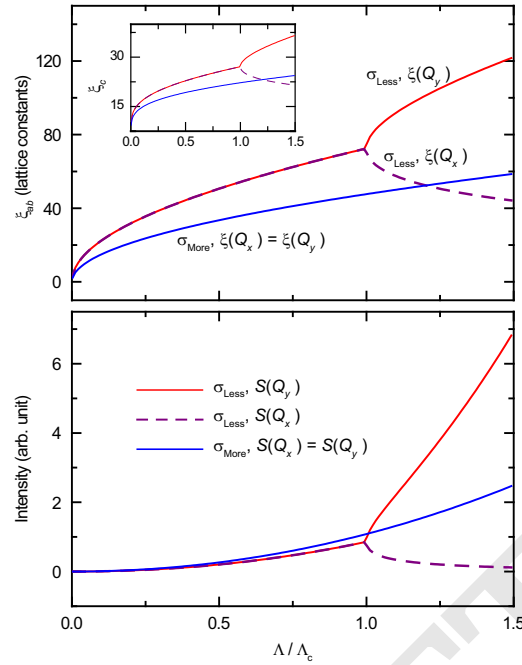

**Fig. S1.** Correlation lengths (upper panel) and peak intensities (lower panel) associated with the  $x$  and  $y$  directed components of the CDW order parameter as a function of increasing mean squared magnitude of the local CDW order parameter for the “Less” and “More” disordered regions. We have taken  $\sigma_{\text{More}} = 1.5\sigma_{\text{Less}}$ ,  $V_z = 0.1$ , and for graphical clarity have rescaled  $S$  for the More disordered regions by a factor of 3. The main panel a shows the in-plane correlation lengths, while the inset shows the correlation length with the  $z$ -direction (e.g.,  $c$ -axis). Here,  $\Lambda_c$  is the critical value of the CDW magnitude in the Less disordered regions, and for simplicity we show results for  $T = 0$ .  $\xi_{ab}(\mathbf{Q})$  and  $\xi_c(\mathbf{Q})$  are the in-plane and out-of-plane correlation lengths corresponding to ordering vector  $\mathbf{Q}$ , respectively.

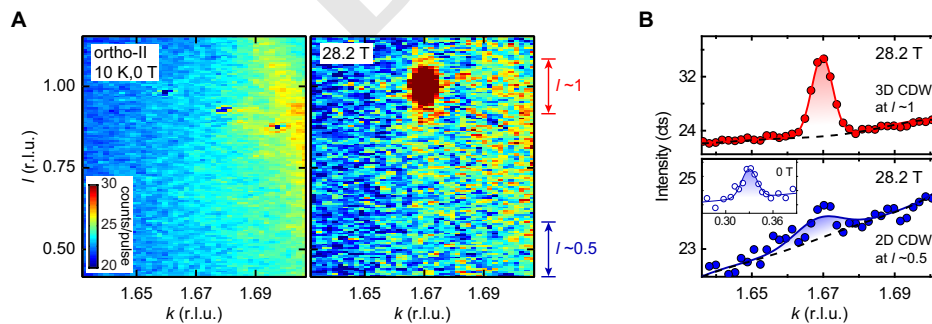

**Fig. S2.** (A) Diffraction intensity of ortho-II in the  $kl$ -plane near  $(0, 2-q, 1)$  at zero magnetic field (left panel) and at high magnetic field (right panel). Note that the feature around  $k \sim 1.7$  and  $l \sim 0.8$  is a condensation of water molecules results in the formation of an “ice ring” in the vicinity of the CDW signal [S10]. (B) Projected intensities from the diffraction pattern at  $\mu_0 H = 28.2$  T near  $l \sim 1$  (upper panel) and  $l \sim 0.5$  (lower panel). It indicates the coexistence of 3D and quasi-2D CDW orders in YBCO ortho-II under the high magnetic field. Inset (RSXS data) shows the quasi-2D CDW orders in YBCO ortho-II at  $\mu_0 H = 0$  T and  $T \sim 20$  K. Colored solid lines are Gaussian fits to the high-field data with polynomial backgrounds at zero-field (black dashed line).

497  
498  
499  
500  
501  
502  
503  
504  
505  
506  
507  
508  
509  
510  
511  
512  
513  
514  
515  
516  
517  
518  
519  
520  
521  
522  
523  
524  
525  
526  
527  
528  
529  
530  
531  
532  
533  
534  
535  
536  
537  
538  
539  
540  
541  
542  
543  
544  
545  
546  
547  
548  
549  
550  
551  
552  
553  
554  
555  
556  
557  
558

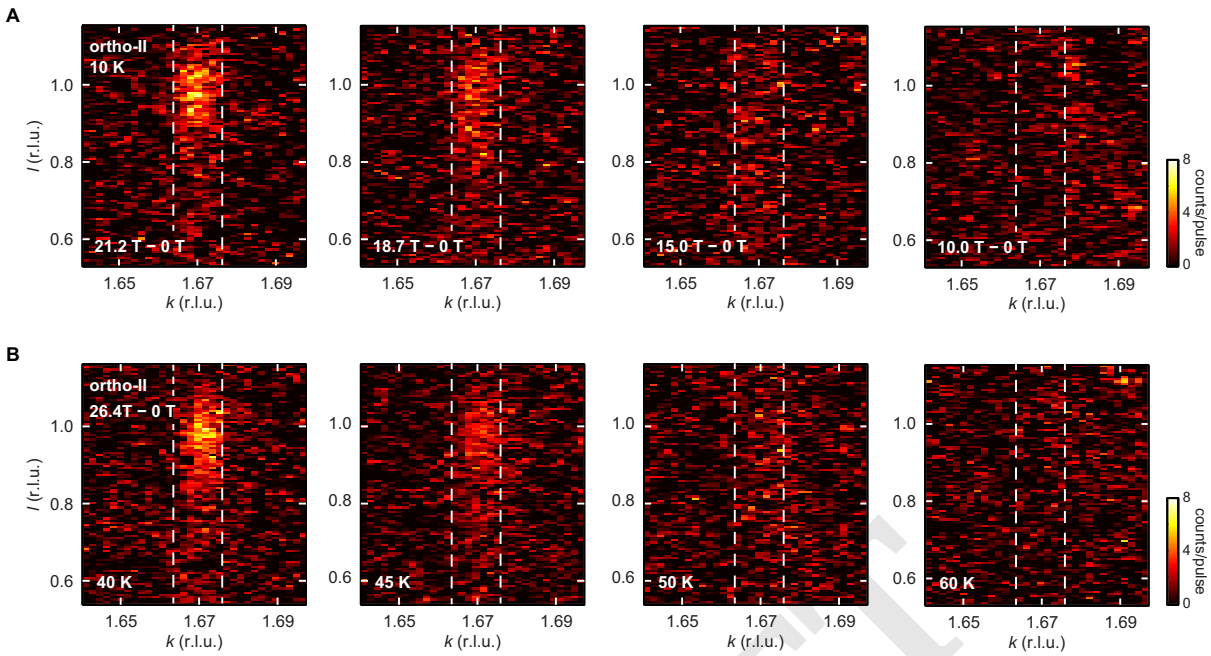

**Fig. S3.** (A) Magnetic field dependencies. (B) Temperature dependencies. Dashed lines indicate the windows used to deduce the projected peak profiles of Figs. 2A and 2D in the main text.

559  
560  
561  
562  
563  
564  
565  
566  
567  
568  
569  
570  
571  
572  
573  
574  
575  
576  
577  
578  
579  
580  
581  
582  
583  
584  
585  
586  
587  
588  
589  
590  
591  
592  
593  
594  
595  
596  
597  
598  
599  
600  
601  
602  
603  
604  
605  
606  
607  
608  
609  
610  
611  
612  
613  
614  
615  
616  
617  
618  
619  
620

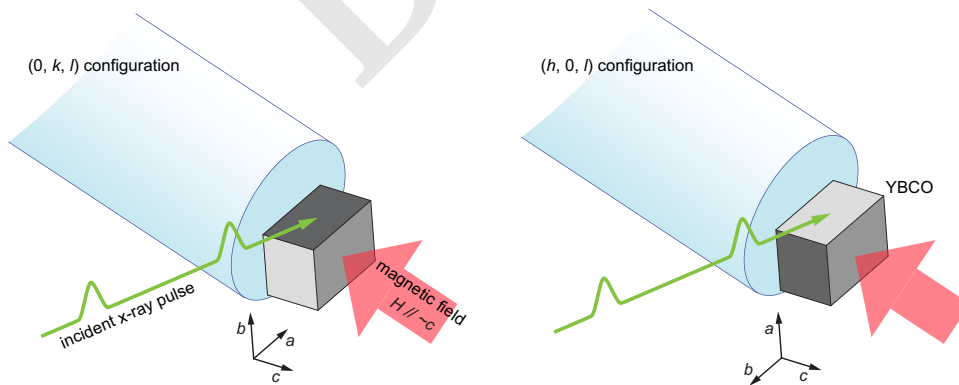

**Fig. S4.** Crystallographic orientations of YBCO crystals used for the measurement of the  $(0, k, l)$  reflection (left) and  $(h, 0, l)$  reflection (right). The green line represents the incident x-ray free electron pulses. The red arrow indicates the direction of the magnetic field.
